# Supplementary material for: Major shifts at the range edge of marine forests: the combined effects of climate changes and limited dispersal
Source: PubMed Central journal article supplement (PMC5343584; doi:10.1038/srep44348), 2017-03-09

## Supplementary Information

### **Major shifts at the range edge of marine forests: the combined effects of climate changes and limited dispersal**

Assis, J.\*<sup>1</sup>, Bercibar, E.<sup>2</sup>, Claro, B.<sup>1</sup>, Alberto, F.<sup>3</sup>, Reed, D.<sup>4</sup>, Raimondi, P.<sup>5</sup>, Serrão, E.A.<sup>1</sup>

<sup>1</sup> CCMAR, Centro de Ciências do Mar, Universidade do Algarve, Campus de Gambelas, 8005-139 Faro, Portugal.

<sup>2</sup> Estrutura de Missão para a Extensão da Plataforma Continental (EMEPC), Rua Costa Pinto 165, 2770-042, Paço de Arcos, Portugal

<sup>3</sup> Department of Biological Sciences, University of Wisconsin-Milwaukee, Milwaukee, Wisconsin 53201 USA

<sup>4</sup> Marine Science Institute, University of California, Santa Barbara, California 93106 USA

<sup>5</sup> Department of Biology, University of California, Santa Cruz, California 95064 USA

**Corresponding author (\*):** Jorge Assis (jorgemfa@gmail.com | +351 912 361 127)

Supplementary Figure S1. Study region (~5000 km). Orange contour along the coast represent the modelling cells on a 5 km resolution. (Left panel) Sampling effort for *Saccorhiza polyschides* (year; black dots represent sampling sites). (Right panel) Data compiled from literature (black dots represent sites where information for *S. polyschides* was available). Maps generated with QGIS (QGIS Development Team, 2016. QGIS Geographic Information System. Open Source Geospatial Foundation Project. <http://www.qgis.org/>).

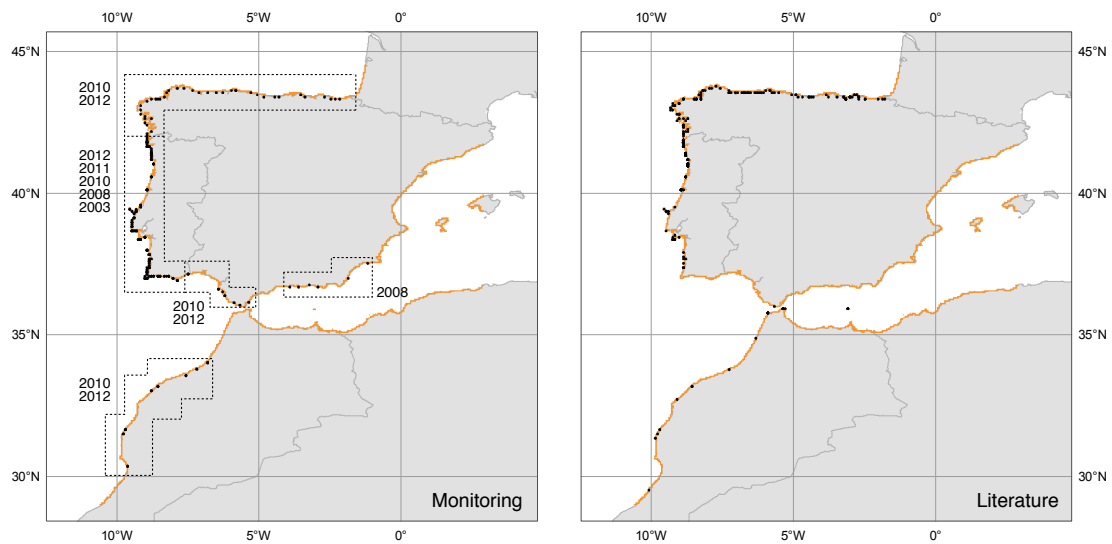

Supplementary Table S1. Records of occurrence used for modelling the distribution of *Saccorhiza polyschides* with information for Longitude (Lon), Latitude (Lat), Year, presence or absence (PA), type of record (Field survey or literature) and Reference citation.

| Lon    | Lat    | Year | PA | Type       | Reference |
|--------|--------|------|----|------------|-----------|
| -8.875 | 41.775 | 2003 | 1  | Monitoring | -         |
| -8.875 | 41.675 | 2003 | 1  | Monitoring | -         |
| -8.775 | 41.475 | 2003 | 1  | Monitoring | -         |
| -8.725 | 41.275 | 2003 | 1  | Monitoring | -         |
| -8.725 | 41.225 | 2003 | 1  | Monitoring | -         |
| -8.675 | 41.025 | 2003 | 1  | Monitoring | -         |
| -8.775 | 40.625 | 2003 | 1  | Monitoring | -         |
| -8.875 | 40.175 | 2003 | 1  | Monitoring | -         |
| -9.125 | 39.525 | 2003 | 1  | Monitoring | -         |
| -9.325 | 39.375 | 2003 | 1  | Monitoring | -         |
| -9.475 | 38.875 | 2003 | 1  | Monitoring | -         |
| -9.475 | 38.725 | 2003 | 1  | Monitoring | -         |
| -9.325 | 38.675 | 2003 | 1  | Monitoring | -         |
| -8.975 | 38.475 | 2003 | 1  | Monitoring | -         |
| -9.225 | 38.425 | 2003 | 1  | Monitoring | -         |
| -9.125 | 38.425 | 2003 | 1  | Monitoring | -         |
| -8.875 | 37.975 | 2003 | 1  | Monitoring | -         |
| -8.925 | 37.225 | 2003 | 1  | Monitoring | -         |
| -8.525 | 37.125 | 2003 | 0  | Monitoring | -         |
| -8.675 | 37.075 | 2003 | 1  | Monitoring | -         |
| -8.475 | 37.075 | 2003 | 0  | Monitoring | -         |
| -8.225 | 37.075 | 2003 | 0  | Monitoring | -         |
| -8.925 | 37.025 | 2003 | 1  | Monitoring | -         |
| -8.025 | 37.025 | 2003 | 0  | Monitoring | -         |
| -6.425 | 36.675 | 2003 | 0  | Monitoring | -         |
| -8.875 | 41.825 | 2008 | 1  | Monitoring | -         |
| -8.875 | 41.675 | 2008 | 1  | Monitoring | -         |
| -8.825 | 41.625 | 2008 | 1  | Monitoring | -         |
| -8.775 | 41.425 | 2008 | 1  | Monitoring | -         |
| -8.775 | 41.375 | 2008 | 1  | Monitoring | -         |
| -8.725 | 41.175 | 2008 | 1  | Monitoring | -         |
| -8.675 | 41.025 | 2008 | 1  | Monitoring | -         |
| -8.875 | 40.175 | 2008 | 1  | Monitoring | -         |
| -9.325 | 39.375 | 2008 | 1  | Monitoring | -         |
| -9.375 | 39.125 | 2008 | 1  | Monitoring | -         |
| -9.425 | 38.975 | 2008 | 1  | Monitoring | -         |
| -9.225 | 38.425 | 2008 | 1  | Monitoring | -         |
| -8.825 | 37.625 | 2008 | 1  | Monitoring | -         |
| -1.175 | 37.525 | 2008 | 0  | Monitoring | -         |
| -8.825 | 37.425 | 2008 | 0  | Monitoring | -         |
| -7.475 | 37.175 | 2008 | 0  | Monitoring | -         |
| -8.525 | 37.125 | 2008 | 0  | Monitoring | -         |
| -8.975 | 37.075 | 2008 | 0  | Monitoring | -         |
| -8.775 | 37.075 | 2008 | 0  | Monitoring | -         |
| -8.175 | 37.075 | 2008 | 0  | Monitoring | -         |
| -6.725 | 37.075 | 2008 | 0  | Monitoring | -         |

| Lon    | Lat    | Year | PA | Type       | Reference |
|--------|--------|------|----|------------|-----------|
| -8.925 | 37.025 | 2008 | 0  | Monitoring | -         |
| -6.625 | 37.025 | 2008 | 0  | Monitoring | -         |
| -1.875 | 37.025 | 2008 | 0  | Monitoring | -         |
| -6.425 | 36.875 | 2008 | 0  | Monitoring | -         |
| -6.425 | 36.775 | 2008 | 0  | Monitoring | -         |
| -3.225 | 36.775 | 2008 | 0  | Monitoring | -         |
| -3.925 | 36.725 | 2008 | 0  | Monitoring | -         |
| -3.625 | 36.725 | 2008 | 0  | Monitoring | -         |
| -2.875 | 36.725 | 2008 | 0  | Monitoring | -         |
| -6.425 | 36.675 | 2008 | 0  | Monitoring | -         |
| -6.175 | 36.375 | 2008 | 0  | Monitoring | -         |
| -5.775 | 43.625 | 2010 | 1  | Monitoring | -         |
| -8.725 | 43.325 | 2010 | 1  | Monitoring | -         |
| -8.525 | 43.325 | 2010 | 1  | Monitoring | -         |
| -9.125 | 42.825 | 2010 | 1  | Monitoring | -         |
| -9.025 | 42.675 | 2010 | 1  | Monitoring | -         |
| -8.875 | 42.025 | 2010 | 1  | Monitoring | -         |
| -8.875 | 41.925 | 2010 | 1  | Monitoring | -         |
| -8.875 | 41.825 | 2010 | 1  | Monitoring | -         |
| -8.875 | 41.725 | 2010 | 1  | Monitoring | -         |
| -8.825 | 41.625 | 2010 | 1  | Monitoring | -         |
| -8.775 | 41.575 | 2010 | 1  | Monitoring | -         |
| -8.775 | 41.525 | 2010 | 1  | Monitoring | -         |
| -8.775 | 41.375 | 2010 | 1  | Monitoring | -         |
| -8.725 | 41.225 | 2010 | 1  | Monitoring | -         |
| -8.675 | 41.025 | 2010 | 1  | Monitoring | -         |
| -8.775 | 40.625 | 2010 | 1  | Monitoring | -         |
| -8.875 | 40.175 | 2010 | 1  | Monitoring | -         |
| -9.275 | 39.425 | 2010 | 1  | Monitoring | -         |
| -9.375 | 39.325 | 2010 | 1  | Monitoring | -         |
| -9.375 | 39.125 | 2010 | 1  | Monitoring | -         |
| -9.425 | 38.975 | 2010 | 1  | Monitoring | -         |
| -9.175 | 38.425 | 2010 | 1  | Monitoring | -         |
| -8.875 | 37.975 | 2010 | 0  | Monitoring | -         |
| -8.825 | 37.825 | 2010 | 0  | Monitoring | -         |
| -8.775 | 37.725 | 2010 | 0  | Monitoring | -         |
| -8.925 | 37.175 | 2010 | 1  | Monitoring | -         |
| -7.475 | 37.175 | 2010 | 0  | Monitoring | -         |
| -8.575 | 37.125 | 2010 | 0  | Monitoring | -         |
| -8.775 | 37.075 | 2010 | 0  | Monitoring | -         |
| -8.675 | 37.075 | 2010 | 0  | Monitoring | -         |
| -8.475 | 37.075 | 2010 | 0  | Monitoring | -         |
| -6.725 | 37.075 | 2010 | 0  | Monitoring | -         |
| -8.975 | 37.025 | 2010 | 0  | Monitoring | -         |
| -8.925 | 37.025 | 2010 | 0  | Monitoring | -         |
| -8.875 | 37.025 | 2010 | 0  | Monitoring | -         |
| -6.425 | 36.875 | 2010 | 0  | Monitoring | -         |
| -6.425 | 36.675 | 2010 | 0  | Monitoring | -         |
| -6.175 | 36.375 | 2010 | 0  | Monitoring | -         |
| -5.625 | 36.025 | 2010 | 1  | Monitoring | -         |
| -6.175 | 35.175 | 2010 | 0  | Monitoring | -         |
| -6.825 | 34.025 | 2010 | 0  | Monitoring | -         |
| -7.175 | 33.825 | 2010 | 0  | Monitoring | -         |
| -7.525 | 33.625 | 2010 | 0  | Monitoring | -         |
| -8.575 | 33.225 | 2010 | 1  | Monitoring | -         |

| Lon    | Lat    | Year | PA | Type       | Reference |
|--------|--------|------|----|------------|-----------|
| -8.725 | 33.025 | 2010 | 1  | Monitoring | -         |
| -9.675 | 31.725 | 2010 | 1  | Monitoring | -         |
| -9.775 | 31.525 | 2010 | 1  | Monitoring | -         |
| -9.625 | 30.375 | 2010 | 0  | Monitoring | -         |
| -8.875 | 41.825 | 2011 | 1  | Monitoring | -         |
| -8.875 | 41.675 | 2011 | 1  | Monitoring | -         |
| -8.825 | 41.625 | 2011 | 1  | Monitoring | -         |
| -8.775 | 41.425 | 2011 | 1  | Monitoring | -         |
| -8.725 | 41.175 | 2011 | 1  | Monitoring | -         |
| -8.675 | 41.025 | 2011 | 1  | Monitoring | -         |
| -8.875 | 40.175 | 2011 | 1  | Monitoring | -         |
| -9.325 | 39.375 | 2011 | 1  | Monitoring | -         |
| -9.375 | 39.125 | 2011 | 1  | Monitoring | -         |
| -9.425 | 38.975 | 2011 | 1  | Monitoring | -         |
| -9.225 | 38.425 | 2011 | 1  | Monitoring | -         |
| -9.125 | 38.425 | 2011 | 1  | Monitoring | -         |
| -8.875 | 37.975 | 2011 | 0  | Monitoring | -         |
| -8.875 | 37.325 | 2011 | 1  | Monitoring | -         |
| -8.775 | 37.075 | 2011 | 0  | Monitoring | -         |
| -8.675 | 37.075 | 2011 | 0  | Monitoring | -         |
| -8.475 | 37.075 | 2011 | 0  | Monitoring | -         |
| -8.275 | 37.075 | 2011 | 0  | Monitoring | -         |
| -8.125 | 37.075 | 2011 | 0  | Monitoring | -         |
| -8.975 | 37.025 | 2011 | 0  | Monitoring | -         |
| -8.925 | 37.025 | 2011 | 0  | Monitoring | -         |
| -8.025 | 37.025 | 2011 | 0  | Monitoring | -         |
| -7.825 | 36.975 | 2011 | 0  | Monitoring | -         |
| -5.625 | 36.025 | 2011 | 1  | Monitoring | -         |
| -6.175 | 35.175 | 2011 | 0  | Monitoring | -         |
| -6.825 | 34.025 | 2011 | 0  | Monitoring | -         |
| -8.575 | 33.225 | 2011 | 1  | Monitoring | -         |
| -9.675 | 31.725 | 2011 | 1  | Monitoring | -         |
| -9.625 | 30.375 | 2011 | 0  | Monitoring | -         |
| -7.875 | 43.725 | 2012 | 1  | Monitoring | -         |
| -7.625 | 43.725 | 2012 | 1  | Monitoring | -         |
| -8.125 | 43.675 | 2012 | 1  | Monitoring | -         |
| -7.325 | 43.625 | 2012 | 1  | Monitoring | -         |
| -5.925 | 43.625 | 2012 | 1  | Monitoring | -         |
| -5.775 | 43.625 | 2012 | 0  | Monitoring | -         |
| -8.225 | 43.575 | 2012 | 1  | Monitoring | -         |
| -7.075 | 43.575 | 2012 | 1  | Monitoring | -         |
| -6.825 | 43.575 | 2012 | 1  | Monitoring | -         |
| -6.475 | 43.575 | 2012 | 1  | Monitoring | -         |
| -6.275 | 43.575 | 2012 | 1  | Monitoring | -         |
| -5.275 | 43.525 | 2012 | 0  | Monitoring | -         |
| -5.025 | 43.475 | 2012 | 0  | Monitoring | -         |
| -3.525 | 43.475 | 2012 | 0  | Monitoring | -         |
| -8.275 | 43.425 | 2012 | 1  | Monitoring | -         |
| -4.775 | 43.425 | 2012 | 0  | Monitoring | -         |
| -4.425 | 43.425 | 2012 | 0  | Monitoring | -         |
| -4.275 | 43.425 | 2012 | 0  | Monitoring | -         |
| -3.325 | 43.425 | 2012 | 0  | Monitoring | -         |
| -2.675 | 43.425 | 2012 | 0  | Monitoring | -         |
| -8.425 | 43.375 | 2012 | 1  | Monitoring | -         |
| -8.625 | 43.325 | 2012 | 1  | Monitoring | -         |

| Lon    | Lat    | Year | PA | Type       | Reference |
|--------|--------|------|----|------------|-----------|
| -2.425 | 43.325 | 2012 | 0  | Monitoring | -         |
| -2.275 | 43.325 | 2012 | 0  | Monitoring | -         |
| -2.125 | 43.325 | 2012 | 0  | Monitoring | -         |
| -8.925 | 43.275 | 2012 | 1  | Monitoring | -         |
| -9.175 | 43.125 | 2012 | 1  | Monitoring | -         |
| -9.125 | 42.925 | 2012 | 1  | Monitoring | -         |
| -9.025 | 42.725 | 2012 | 1  | Monitoring | -         |
| -8.775 | 42.625 | 2012 | 1  | Monitoring | -         |
| -9.025 | 42.525 | 2012 | 1  | Monitoring | -         |
| -8.875 | 42.425 | 2012 | 1  | Monitoring | -         |
| -8.775 | 42.225 | 2012 | 1  | Monitoring | -         |
| -8.875 | 42.125 | 2012 | 1  | Monitoring | -         |
| -8.875 | 41.975 | 2012 | 1  | Monitoring | -         |
| -8.875 | 41.775 | 2012 | 1  | Monitoring | -         |
| -8.825 | 41.625 | 2012 | 1  | Monitoring | -         |
| -8.775 | 41.475 | 2012 | 1  | Monitoring | -         |
| -8.725 | 41.325 | 2012 | 1  | Monitoring | -         |
| -8.675 | 41.025 | 2012 | 1  | Monitoring | -         |
| -8.775 | 40.625 | 2012 | 1  | Monitoring | -         |
| -8.875 | 40.175 | 2012 | 1  | Monitoring | -         |
| -9.375 | 39.325 | 2012 | 0  | Monitoring | -         |
| -9.425 | 39.075 | 2012 | 1  | Monitoring | -         |
| -9.225 | 38.425 | 2012 | 1  | Monitoring | -         |
| -8.825 | 37.475 | 2012 | 1  | Monitoring | -         |
| -8.875 | 37.375 | 2012 | 1  | Monitoring | -         |
| -8.925 | 37.175 | 2012 | 1  | Monitoring | -         |
| -8.825 | 37.075 | 2012 | 0  | Monitoring | -         |
| -8.675 | 37.075 | 2012 | 0  | Monitoring | -         |
| -8.275 | 37.075 | 2012 | 0  | Monitoring | -         |
| -8.125 | 37.075 | 2012 | 0  | Monitoring | -         |
| -8.975 | 37.025 | 2012 | 0  | Monitoring | -         |
| -8.925 | 37.025 | 2012 | 0  | Monitoring | -         |
| -7.825 | 36.975 | 2012 | 0  | Monitoring | -         |
| -5.625 | 36.025 | 2012 | 1  | Monitoring | -         |
| -6.825 | 34.025 | 2012 | 0  | Monitoring | -         |
| -7.175 | 33.825 | 2012 | 0  | Monitoring | -         |
| -7.525 | 33.625 | 2012 | 0  | Monitoring | -         |
| -8.725 | 33.025 | 2012 | 1  | Monitoring | -         |
| -9.675 | 31.725 | 2012 | 1  | Monitoring | -         |
| -9.775 | 31.525 | 2012 | 1  | Monitoring | -         |
| -9.625 | 30.375 | 2012 | 0  | Monitoring | -         |
| -5.775 | 43.625 | 1986 | 1  | Literature | 1         |
| -5.725 | 43.575 | 1986 | 1  | Literature | 1         |
| -8.375 | 43.375 | 1986 | 1  | Literature | 1         |
| -3.175 | 43.375 | 1986 | 1  | Literature | 2         |
| -8.875 | 42.425 | 1986 | 1  | Literature | 1         |
| -8.175 | 43.625 | 1987 | 1  | Literature | 1         |
| -3.175 | 43.375 | 1987 | 1  | Literature | 1         |
| -9.025 | 42.675 | 1987 | 1  | Literature | 1         |
| -7.275 | 43.575 | 1988 | 1  | Literature | 1         |
| -6.025 | 43.575 | 1988 | 1  | Literature | 1         |
| -4.275 | 43.425 | 1988 | 1  | Literature | 1         |
| -2.925 | 43.425 | 1988 | 1  | Literature | 1         |
| -3.125 | 43.375 | 1988 | 1  | Literature | 1         |
| -2.675 | 43.375 | 1988 | 1  | Literature | 1         |

| Lon    | Lat    | Year | PA | Type       | Reference |
|--------|--------|------|----|------------|-----------|
| -1.825 | 43.375 | 1988 | 1  | Literature | 1         |
| -1.775 | 43.375 | 1988 | 1  | Literature | 1         |
| -1.975 | 43.325 | 1988 | 1  | Literature | 1         |
| -9.025 | 43.225 | 1988 | 1  | Literature | 1         |
| -9.225 | 43.175 | 1988 | 1  | Literature | 1         |
| -8.725 | 42.675 | 1988 | 1  | Literature | 1         |
| -8.225 | 43.425 | 1989 | 1  | Literature | 1         |
| -3.775 | 43.425 | 1989 | 1  | Literature | 1         |
| -8.825 | 43.375 | 1989 | 1  | Literature | 1         |
| -8.375 | 43.375 | 1989 | 1  | Literature | 1         |
| -8.275 | 43.375 | 1989 | 1  | Literature | 1         |
| -9.075 | 42.775 | 1989 | 1  | Literature | 1         |
| -8.975 | 42.775 | 1989 | 1  | Literature | 1         |
| -8.875 | 42.425 | 1989 | 1  | Literature | 1         |
| -8.825 | 41.675 | 1989 | 1  | Literature | 1         |
| -8.675 | 41.175 | 1989 | 1  | Literature | 1         |
| -8.875 | 40.175 | 1989 | 1  | Literature | 1         |
| -9.125 | 39.525 | 1989 | 1  | Literature | 1         |
| -9.475 | 38.725 | 1989 | 1  | Literature | 1         |
| -8.975 | 38.475 | 1989 | 1  | Literature | 1         |
| -5.275 | 35.925 | 1989 | 1  | Literature | 3         |
| -5.575 | 35.825 | 1989 | 1  | Literature | 3         |
| -8.575 | 33.225 | 1989 | 1  | Literature | 3         |
| -8.175 | 43.625 | 1990 | 1  | Literature | 1         |
| -6.675 | 43.575 | 1990 | 1  | Literature | 1         |
| -6.625 | 43.575 | 1990 | 1  | Literature | 1         |
| -6.375 | 43.575 | 1990 | 1  | Literature | 1         |
| -8.425 | 43.375 | 1990 | 1  | Literature | 1         |
| -9.225 | 43.125 | 1990 | 1  | Literature | 1         |
| -9.175 | 43.125 | 1990 | 1  | Literature | 1         |
| -9.025 | 42.675 | 1990 | 1  | Literature | 1         |
| -8.725 | 42.675 | 1990 | 1  | Literature | 1         |
| -8.775 | 41.425 | 1990 | 1  | Literature | 1         |
| -9.525 | 39.425 | 1990 | 1  | Literature | 4         |
| -7.275 | 43.625 | 1991 | 1  | Literature | 1         |
| -7.225 | 43.575 | 1991 | 1  | Literature | 1         |
| -3.825 | 43.475 | 1991 | 1  | Literature | 1         |
| -2.825 | 43.475 | 1991 | 1  | Literature | 5         |
| -2.775 | 43.475 | 1991 | 1  | Literature | 5         |
| -3.225 | 43.425 | 1991 | 1  | Literature | 5         |
| -2.975 | 43.425 | 1991 | 1  | Literature | 5         |
| -8.225 | 43.375 | 1991 | 1  | Literature | 1         |
| -8.825 | 43.325 | 1991 | 1  | Literature | 1         |
| -2.425 | 43.325 | 1991 | 1  | Literature | 5         |
| -9.275 | 42.975 | 1991 | 1  | Literature | 1         |
| -8.775 | 42.575 | 1991 | 1  | Literature | 1         |
| -8.325 | 43.475 | 1992 | 1  | Literature | 1         |
| -4.875 | 43.475 | 1992 | 1  | Literature | 1         |
| -4.475 | 43.425 | 1992 | 1  | Literature | 1         |
| -8.425 | 43.375 | 1992 | 1  | Literature | 1         |
| -8.825 | 42.175 | 1992 | 1  | Literature | 1         |
| -8.775 | 42.175 | 1992 | 1  | Literature | 1         |
| -6.525 | 43.575 | 1993 | 1  | Literature | 1         |
| -6.175 | 43.575 | 1993 | 1  | Literature | 1         |
| -7.025 | 43.525 | 1993 | 1  | Literature | 1         |

| Lon    | Lat    | Year | PA | Type       | Reference |
|--------|--------|------|----|------------|-----------|
| -8.875 | 42.125 | 1993 | 1  | Literature | 1         |
| -8.875 | 42.075 | 1993 | 1  | Literature | 1         |
| -8.875 | 41.925 | 1993 | 1  | Literature | 1         |
| -8.875 | 41.775 | 1993 | 1  | Literature | 1         |
| -8.875 | 41.725 | 1993 | 1  | Literature | 1         |
| -9.225 | 38.425 | 1993 | 1  | Literature | 6         |
| -8.825 | 37.925 | 1993 | 1  | Literature | 7         |
| -8.825 | 37.775 | 1993 | 1  | Literature | 7         |
| -8.775 | 37.725 | 1993 | 1  | Literature | 7         |
| -8.825 | 37.675 | 1993 | 1  | Literature | 7         |
| -8.825 | 37.525 | 1993 | 1  | Literature | 7         |
| -8.825 | 37.425 | 1993 | 1  | Literature | 7         |
| -8.825 | 37.375 | 1993 | 1  | Literature | 7         |
| -5.625 | 36.025 | 1993 | 1  | Literature | 1         |
| -6.575 | 43.575 | 1994 | 1  | Literature | 1         |
| -8.725 | 42.225 | 1994 | 1  | Literature | 1         |
| -5.375 | 35.925 | 1995 | 1  | Literature | 8         |
| -5.875 | 35.825 | 1995 | 1  | Literature | 8         |
| -5.575 | 35.825 | 1995 | 1  | Literature | 8         |
| -5.875 | 35.775 | 1995 | 1  | Literature | 8         |
| -9.675 | 31.725 | 1995 | 1  | Literature | 3         |
| -9.175 | 38.525 | 1996 | 1  | Literature | 9         |
| -9.225 | 38.475 | 1996 | 1  | Literature | 9         |
| -9.225 | 38.425 | 1996 | 1  | Literature | 9         |
| -9.175 | 38.425 | 1996 | 1  | Literature | 9         |
| -9.125 | 38.425 | 1996 | 1  | Literature | 9         |
| -5.375 | 35.925 | 1996 | 1  | Literature | 8         |
| -5.875 | 35.825 | 1996 | 1  | Literature | 8         |
| -5.575 | 35.825 | 1996 | 1  | Literature | 8         |
| -5.875 | 35.775 | 1996 | 1  | Literature | 8         |
| -9.675 | 31.725 | 1996 | 1  | Literature | 3         |
| -9.225 | 38.425 | 1997 | 1  | Literature | 10        |
| -8.875 | 41.875 | 1999 | 1  | Literature | 11        |
| -8.875 | 41.775 | 1999 | 1  | Literature | 11        |
| -8.825 | 41.625 | 1999 | 1  | Literature | 11        |
| -8.775 | 41.475 | 1999 | 1  | Literature | 11        |
| -8.775 | 41.375 | 1999 | 1  | Literature | 11        |
| -8.725 | 41.225 | 1999 | 1  | Literature | 11        |
| -8.675 | 41.075 | 1999 | 1  | Literature | 11        |
| -8.675 | 40.975 | 1999 | 1  | Literature | 11        |
| -8.775 | 40.625 | 1999 | 1  | Literature | 11        |
| -8.925 | 40.175 | 1999 | 1  | Literature | 11        |
| -8.875 | 41.875 | 2000 | 1  | Literature | 11        |
| -8.875 | 41.775 | 2000 | 1  | Literature | 11        |
| -8.825 | 41.625 | 2000 | 1  | Literature | 11        |
| -8.775 | 41.475 | 2000 | 1  | Literature | 11        |
| -8.775 | 41.375 | 2000 | 1  | Literature | 11        |
| -8.725 | 41.225 | 2000 | 1  | Literature | 11        |
| -8.675 | 41.075 | 2000 | 1  | Literature | 11        |
| -8.675 | 40.975 | 2000 | 1  | Literature | 11        |
| -8.775 | 40.625 | 2000 | 1  | Literature | 11        |
| -8.925 | 40.175 | 2000 | 1  | Literature | 11        |
| -9.225 | 38.425 | 2000 | 1  | Literature | 9         |
| -8.875 | 41.875 | 2001 | 1  | Literature | 11        |
| -8.875 | 41.775 | 2001 | 1  | Literature | 11        |



| Lon    | Lat    | Year | PA | Type       | Reference |
|--------|--------|------|----|------------|-----------|
| -8.825 | 41.625 | 2001 | 1  | Literature | 11        |
| -8.775 | 41.475 | 2001 | 1  | Literature | 11        |
| -8.775 | 41.375 | 2001 | 1  | Literature | 11        |
| -8.725 | 41.225 | 2001 | 1  | Literature | 11        |
| -8.675 | 41.075 | 2001 | 1  | Literature | 11        |
| -8.675 | 40.975 | 2001 | 1  | Literature | 11        |
| -8.775 | 40.625 | 2001 | 1  | Literature | 11        |
| -8.925 | 40.175 | 2001 | 1  | Literature | 11        |
| -8.875 | 41.875 | 2002 | 1  | Literature | 11        |
| -8.875 | 41.775 | 2002 | 1  | Literature | 11        |
| -8.825 | 41.625 | 2002 | 1  | Literature | 11        |
| -8.775 | 41.475 | 2002 | 1  | Literature | 11        |
| -8.775 | 41.375 | 2002 | 1  | Literature | 11        |
| -8.725 | 41.225 | 2002 | 1  | Literature | 11        |
| -8.675 | 41.075 | 2002 | 1  | Literature | 11        |
| -8.675 | 40.975 | 2002 | 1  | Literature | 11        |
| -8.775 | 40.625 | 2002 | 1  | Literature | 11        |
| -8.925 | 40.175 | 2002 | 1  | Literature | 11        |
| -8.575 | 33.225 | 2002 | 1  | Literature | 3         |
| -9.775 | 31.525 | 2002 | 1  | Literature | 3         |
| -8.875 | 41.875 | 2003 | 1  | Literature | 11        |
| -8.875 | 41.775 | 2003 | 1  | Literature | 11        |
| -8.825 | 41.625 | 2003 | 1  | Literature | 11        |
| -8.775 | 41.475 | 2003 | 1  | Literature | 11        |
| -8.775 | 41.375 | 2003 | 1  | Literature | 11        |
| -8.725 | 41.225 | 2003 | 1  | Literature | 11        |
| -8.675 | 41.075 | 2003 | 1  | Literature | 11        |
| -8.675 | 40.975 | 2003 | 1  | Literature | 11        |
| -8.775 | 40.625 | 2003 | 1  | Literature | 11        |
| -8.925 | 40.175 | 2003 | 1  | Literature | 11        |
| -3.175 | 43.375 | 2003 | 0  | Literature | 12        |
| -8.875 | 41.875 | 2004 | 1  | Literature | 11        |
| -8.875 | 41.775 | 2004 | 1  | Literature | 11        |
| -8.825 | 41.625 | 2004 | 1  | Literature | 11        |
| -8.775 | 41.475 | 2004 | 1  | Literature | 11        |
| -8.775 | 41.375 | 2004 | 1  | Literature | 11        |
| -8.725 | 41.225 | 2004 | 1  | Literature | 11        |
| -8.675 | 41.075 | 2004 | 1  | Literature | 11        |
| -8.675 | 40.975 | 2004 | 1  | Literature | 11        |
| -8.775 | 40.625 | 2004 | 1  | Literature | 11        |
| -8.925 | 40.175 | 2004 | 1  | Literature | 11        |
| -8.875 | 41.875 | 2005 | 1  | Literature | 11        |
| -8.875 | 41.775 | 2005 | 1  | Literature | 11        |
| -8.825 | 41.625 | 2005 | 1  | Literature | 11        |
| -8.775 | 41.475 | 2005 | 1  | Literature | 11        |
| -8.775 | 41.375 | 2005 | 1  | Literature | 11        |
| -8.725 | 41.225 | 2005 | 1  | Literature | 11        |
| -8.675 | 41.075 | 2005 | 1  | Literature | 11        |
| -8.675 | 40.975 | 2005 | 1  | Literature | 11        |
| -8.775 | 40.625 | 2005 | 1  | Literature | 11        |
| -8.925 | 40.175 | 2005 | 1  | Literature | 11        |
| -2.975 | 43.425 | 2006 | 1  | Literature | 12        |
| -8.875 | 41.875 | 2006 | 1  | Literature | 11        |
| -8.875 | 41.775 | 2006 | 1  | Literature | 11        |
| -8.825 | 41.625 | 2006 | 1  | Literature | 11        |

| Lon    | Lat    | Year | PA | Type       | Reference |
|--------|--------|------|----|------------|-----------|
| -8.775 | 41.475 | 2006 | 1  | Literature | 11        |
| -8.775 | 41.375 | 2006 | 1  | Literature | 11        |
| -8.725 | 41.225 | 2006 | 1  | Literature | 11        |
| -8.675 | 41.075 | 2006 | 1  | Literature | 11        |
| -8.675 | 40.975 | 2006 | 1  | Literature | 11        |
| -8.775 | 40.625 | 2006 | 1  | Literature | 11        |
| -8.925 | 40.175 | 2006 | 1  | Literature | 11        |
| -2.675 | 43.425 | 2007 | 1  | Literature | 12        |
| -8.875 | 41.875 | 2007 | 1  | Literature | 11        |
| -8.875 | 41.775 | 2007 | 1  | Literature | 11        |
| -8.825 | 41.625 | 2007 | 1  | Literature | 11        |
| -8.775 | 41.475 | 2007 | 1  | Literature | 11        |
| -8.775 | 41.375 | 2007 | 1  | Literature | 11        |
| -8.725 | 41.225 | 2007 | 1  | Literature | 11        |
| -8.675 | 41.075 | 2007 | 1  | Literature | 11        |
| -9.425 | 39.375 | 2007 | 1  | Literature | 13        |
| -9.375 | 39.375 | 2007 | 1  | Literature | 13        |
| -3.175 | 43.375 | 2007 | 0  | Literature | 12        |
| -2.675 | 43.425 | 2008 | 1  | Literature | 12        |
| -9.425 | 39.375 | 2008 | 1  | Literature | 5         |
| -2.825 | 43.475 | 2008 | 0  | Literature | 5         |
| -2.775 | 43.475 | 2008 | 0  | Literature | 5         |
| -3.225 | 43.425 | 2008 | 0  | Literature | 5         |
| -2.975 | 43.425 | 2008 | 0  | Literature | 5         |
| -3.175 | 43.375 | 2008 | 0  | Literature | 12        |
| -2.425 | 43.325 | 2008 | 0  | Literature | 5         |
| -3.425 | 43.425 | 2009 | 1  | Literature | 14        |
| -7.725 | 43.775 | 2010 | 1  | Literature | 15        |
| -7.925 | 43.725 | 2010 | 1  | Literature | 15        |
| -7.875 | 43.725 | 2010 | 1  | Literature | 15        |
| -7.575 | 43.725 | 2010 | 1  | Literature | 15        |
| -8.075 | 43.675 | 2010 | 1  | Literature | 15        |
| -5.975 | 43.625 | 2010 | 1  | Literature | 15        |
| -8.275 | 43.575 | 2010 | 1  | Literature | 15        |
| -7.175 | 43.575 | 2010 | 1  | Literature | 15        |
| -6.975 | 43.575 | 2010 | 1  | Literature | 15        |
| -6.825 | 43.575 | 2010 | 1  | Literature | 15        |
| -6.675 | 43.575 | 2010 | 1  | Literature | 15        |
| -6.475 | 43.575 | 2010 | 1  | Literature | 15        |
| -6.275 | 43.575 | 2010 | 1  | Literature | 15        |
| -6.075 | 43.575 | 2010 | 1  | Literature | 15        |
| -8.275 | 43.475 | 2010 | 1  | Literature | 15        |
| -8.375 | 43.375 | 2010 | 1  | Literature | 15        |
| -8.875 | 43.325 | 2010 | 1  | Literature | 15        |
| -8.975 | 43.225 | 2010 | 1  | Literature | 15        |
| -9.175 | 43.125 | 2010 | 1  | Literature | 15        |
| -9.275 | 43.025 | 2010 | 1  | Literature | 15        |
| -9.225 | 42.925 | 2010 | 1  | Literature | 15        |
| -9.025 | 42.775 | 2010 | 1  | Literature | 15        |
| -8.875 | 42.625 | 2010 | 1  | Literature | 15        |
| -9.075 | 42.575 | 2010 | 1  | Literature | 15        |
| -8.875 | 42.425 | 2010 | 1  | Literature | 15        |
| -8.875 | 42.325 | 2010 | 1  | Literature | 15        |
| -8.825 | 42.325 | 2010 | 1  | Literature | 15        |
| -8.725 | 42.275 | 2010 | 1  | Literature | 15        |

| Lon    | Lat    | Year | PA | Type       | Reference |
|--------|--------|------|----|------------|-----------|
| -8.825 | 42.125 | 2010 | 1  | Literature | 15        |
| -5.325 | 35.925 | 2010 | 1  | Literature | 16        |
| -3.025 | 35.925 | 2010 | 1  | Literature | 16        |
| -5.775 | 43.625 | 2010 | 0  | Literature | 15        |
| -5.675 | 43.575 | 2010 | 0  | Literature | 15        |
| -5.475 | 43.575 | 2010 | 0  | Literature | 15        |
| -5.025 | 43.475 | 2010 | 0  | Literature | 15        |
| -4.875 | 43.475 | 2010 | 0  | Literature | 15        |
| -4.775 | 43.425 | 2010 | 0  | Literature | 15        |
| -4.625 | 43.425 | 2010 | 0  | Literature | 15        |
| -4.475 | 43.425 | 2010 | 0  | Literature | 15        |
| -4.375 | 43.425 | 2010 | 0  | Literature | 15        |
| -8.725 | 41.175 | 2012 | 1  | Literature | 3         |
| -9.375 | 39.325 | 2012 | 1  | Literature | 3         |
| -5.325 | 35.925 | 2012 | 1  | Literature | 16        |
| -3.025 | 35.925 | 2012 | 1  | Literature | 16        |
| -9.075 | 32.725 | 2012 | 1  | Literature | 3         |
| -9.825 | 31.375 | 2012 | 1  | Literature | 3         |
| -5.975 | 43.625 | 2007 | 1  | Literature | 15        |
| -6.975 | 43.575 | 2007 | 1  | Literature | 15        |
| -6.825 | 43.575 | 2007 | 1  | Literature | 15        |
| -6.675 | 43.575 | 2007 | 1  | Literature | 15        |
| -6.475 | 43.575 | 2007 | 1  | Literature | 15        |
| -6.275 | 43.575 | 2007 | 1  | Literature | 15        |
| -6.075 | 43.575 | 2007 | 1  | Literature | 15        |
| -5.881 | 43.630 | 2007 | 1  | Literature | 15        |
| -6.152 | 43.569 | 2007 | 1  | Literature | 15        |
| -6.562 | 43.575 | 2007 | 1  | Literature | 15        |
| -5.775 | 43.625 | 2007 | 0  | Literature | 15        |
| -5.675 | 43.575 | 2007 | 0  | Literature | 15        |
| -5.475 | 43.575 | 2007 | 0  | Literature | 15        |
| -5.025 | 43.475 | 2007 | 0  | Literature | 15        |
| -4.875 | 43.475 | 2007 | 0  | Literature | 15        |
| -4.775 | 43.425 | 2007 | 0  | Literature | 15        |
| -4.625 | 43.425 | 2007 | 0  | Literature | 15        |
| -4.475 | 43.425 | 2007 | 0  | Literature | 15        |
| -4.375 | 43.425 | 2007 | 0  | Literature | 15        |
| -5.161 | 43.492 | 2007 | 0  | Literature | 15        |
| -5.975 | 43.625 | 2008 | 1  | Literature | 15        |
| -6.975 | 43.575 | 2008 | 1  | Literature | 15        |
| -6.825 | 43.575 | 2008 | 1  | Literature | 15        |
| -6.675 | 43.575 | 2008 | 1  | Literature | 15        |
| -6.475 | 43.575 | 2008 | 1  | Literature | 15        |
| -6.275 | 43.575 | 2008 | 1  | Literature | 15        |
| -6.075 | 43.575 | 2008 | 1  | Literature | 15        |
| -5.881 | 43.630 | 2008 | 1  | Literature | 15        |
| -6.152 | 43.569 | 2008 | 1  | Literature | 15        |
| -6.562 | 43.575 | 2008 | 1  | Literature | 15        |
| -5.775 | 43.625 | 2008 | 0  | Literature | 15        |
| -5.675 | 43.575 | 2008 | 0  | Literature | 15        |
| -5.475 | 43.575 | 2008 | 0  | Literature | 15        |
| -5.025 | 43.475 | 2008 | 0  | Literature | 15        |
| -4.875 | 43.475 | 2008 | 0  | Literature | 15        |
| -4.775 | 43.425 | 2008 | 0  | Literature | 15        |
| -4.625 | 43.425 | 2008 | 0  | Literature | 15        |

| Lon    | Lat    | Year | PA | Type       | Reference |
|--------|--------|------|----|------------|-----------|
| -4.475 | 43.425 | 2008 | 0  | Literature | 15        |
| -4.375 | 43.425 | 2008 | 0  | Literature | 15        |
| -5.161 | 43.492 | 2008 | 0  | Literature | 15        |
| -5.975 | 43.625 | 2009 | 1  | Literature | 15        |
| -6.975 | 43.575 | 2009 | 1  | Literature | 15        |
| -6.825 | 43.575 | 2009 | 1  | Literature | 15        |
| -6.675 | 43.575 | 2009 | 1  | Literature | 15        |
| -6.475 | 43.575 | 2009 | 1  | Literature | 15        |
| -6.275 | 43.575 | 2009 | 1  | Literature | 15        |
| -6.075 | 43.575 | 2009 | 1  | Literature | 15        |
| -5.881 | 43.630 | 2009 | 1  | Literature | 15        |
| -6.152 | 43.569 | 2009 | 1  | Literature | 15        |
| -6.562 | 43.575 | 2009 | 1  | Literature | 15        |
| -5.775 | 43.625 | 2009 | 0  | Literature | 15        |
| -5.675 | 43.575 | 2009 | 0  | Literature | 15        |
| -5.475 | 43.575 | 2009 | 0  | Literature | 15        |
| -5.025 | 43.475 | 2009 | 0  | Literature | 15        |
| -4.875 | 43.475 | 2009 | 0  | Literature | 15        |
| -4.775 | 43.425 | 2009 | 0  | Literature | 15        |
| -4.625 | 43.425 | 2009 | 0  | Literature | 15        |
| -4.475 | 43.425 | 2009 | 0  | Literature | 15        |
| -4.375 | 43.425 | 2009 | 0  | Literature | 15        |
| -5.161 | 43.492 | 2009 | 0  | Literature | 15        |

## References

1. Izquierdo, J. L., Gallardo, T. & Pérez-Ruzafa, I. M. Mapas de distribución de algas marinas de la Península Ibérica e Islas Baleares. IX. *Saccorhiza polyschides* (Lightf.) Batt. y *Chorda filum* (L.) Stackh. (*Laminariales, Fucophyceae*). *Bot. Complut.* **20**, 105–115 (1995).
2. Borja A. & Gorostiaga, J.M. Distribucion geografica de *Saccorhiza polyschides* (Lighthf.) Batt. en la costa vasca. Su posible relacion con la temperatura. *Bentos* **6**, 1–8 (1990).
3. Benhissoune, S., Boudouresque, C. F. & Verlaque, M. A check-list of marine seaweeds of the Mediterranean and Atlantic coasts of Morocco. I. *Chlorophyceae* wille s. l. *Bot. Mar.* **44**, 171–182 (2001).

4. Pereira, L. et al. *MACOI, Portuguese Seaweeds Website. World-wide Electronic Publication. IMAR, Department of Life Sciences, University of Coimbra* (2014)  
Available at: <http://macoi.ci.uc.pt>. (Accessed: 1th May 2015).
5. Díez, I., Muguerza, N., Santolaria, A., Ganzedo, U. & Gorostiaga, J. M. Seaweed assemblage changes in the eastern Cantabrian Sea and their potential relationship to climate change. *Estuar. Coast. Shelf Sci.* **99**, 108–120 (2012).
6. Santos, R. A multivariate study of biotic and abiotic relationships in a subtidal algal stand. *Mar. Ecol. Prog. Ser.* **94**, 181–190 (1993).
7. Carvalho, M. A. D. S. A. *Estudo das comunidades intertidais de macroalgas bentónicas da Área de Paisagem Protegida do Sudoeste Alentejano e Costa Vicentina*. (e.d. Universidade do Algarve) (Faro, 1993).
8. Riadi H., Kazzaz, M. & Ater, M. Contribution a La Connaissance Des Algues Marines Benthiques Du Detroit De Gibraltar Et De La Mediterranee Occidentale Marocaine *Chlorophyceae* Et *Phaeophyceae*. *Acta. Bot. Malacit.* **25**, 5-20 (2000).
9. Almada, V., Gonçalves, E. & Henriques, M. *Inventariação e ecologia da ictiofauna do substrato rochoso da costa Arrábida/Espichel. Instituto Superior de Psicologia Aplicada / Instituto da Conservação da Natureza*. Technical report. (Lisboa, 2002).
10. Henriques, M. & Almada, V. C. Relative importance of cleaning behavior in *Centrolabrus exoletus* and other wrasse at Arrábida, Portugal. *J. Mar. Biol. Ass.* **77**, 891–898 (1997).
11. Araújo, R. et al. Checklist of benthic marine algae and cyanobacteria of northern Portugal. *Bot. Mar.* **52**, 24–46 (2009).

12. Alcock, R. *The Effects of Climate Change on Rocky Shore Communities in the Bay of Biscay, 1895-2050*. PhD Dissertation (ed. University of Southampton) (United Kingdom, 2003).
13. Antunes, D. M. T., Quintino, V. M. S. & Rodrigues, A. M. J. *Identificação e caracterização dos biótopos de uma praia de Peniche*. Technical report. (ed. Universidade de Aveiro) (Aveiro, 2008).
14. González-Irusta, J.M. Contribución al conocimiento del erizo de mar *Paracentrotus lividus*, (Lamarck, 1816) en el Mar Cantábrico: ciclo gonadal y dinámica de poblaciones. PhD Dissertation (ed. Universidad de Cantabria) (Santander, 2009).
15. Fernandez C. The retreat of large brown seaweeds on the north coast of Spain: the case of *Saccorhiza polyschides*. *Eur. J. Phycol.* **46**, 352–360 (2011).
16. Aguilar, R. & Garcia-Ubero, R. *Distribution of Deep-Sea Laminarians around three spanish Marine Protected Areas*. Technical report. (Oceana. Madrid, 2010).

Supplementary Table S2. Environmental predictors used for modelling the distribution of *Saccorhiza polyschides*. Name of predictors (SST - Sea Surface Temperature; SWH - Significant Wave Height; CUI – Coastal Upwelling Index; Winter: NDJF; Spring: MAMJ; Summer: JAS), range in the study region, units, rationale and mean relative contribution to the accuracy of models (bold values show predictors included in the final ensemble).

| Name                                        | Range (unit)     | Rationale                                                                                                            | Contribution (%)  |
|---------------------------------------------|------------------|----------------------------------------------------------------------------------------------------------------------|-------------------|
| Consecutive summer days with SST above 18°C | 37-92 (days)     | Can reduce the performance and growth of adult sporophytes <sup>1,2,3</sup>                                          | 9.25±0.76         |
| Consecutive summer days with SST above 23°C | 0-92 (days)      | Can negatively affect the survival of sporophytes and the spore release, settlement and germination <sup>1,3,4</sup> | 4.94±0.58         |
| Maximum summer SST                          | 19.17-29.28 (°C) | Tipping point for the survival of sporophytes <sup>1,5</sup>                                                         | 8.81±0.82         |
| Consecutive winter days with SST above 18°C | 0-129 (days)     | Can negatively affect the fertility of the female gametophyte <sup>3,4</sup>                                         | <b>15.82±0.82</b> |
| Consecutive winter days with SST above 23°C | 0-28 (days)      | Can negatively affect the survival of gametophytes and young microscopic sporophytes <sup>3,6</sup>                  | 0.32±0.21         |
| Maximum winter SST                          | 17.88-25.54 (°C) | Tipping point for the survival of gametophytes <sup>3,6</sup>                                                        | <b>13.61±0.82</b> |
| Consecutive spring days with SST above 18°C | 0-85 (days)      | Can reduce the performance and growth of young sporophytes <sup>1,2,3,4</sup>                                        | <b>15.72±0.85</b> |
| Consecutive spring days with SST above 23°C | 0-22 (days)      | Can halt the growth and affect the survival of young sporophytes <sup>1,3,4</sup>                                    | 0.17±0.27         |
| Maximum spring SST                          | 17.46-27.02 (°C) | Tipping point for the survival of sporophytes during recruitment <sup>1,3,5</sup>                                    | 13.24±0.81        |
| Consecutive summer days with SWH above 3m   | 0-7 (days)       | Days of high waves can have a major negative effect on sporophytes <sup>7,8</sup>                                    | -0.1±0.29         |
| Maximum SWH of summer                       | 1.57-7.48 (m)    | Individual days of high waves can wipe out sporophytes <sup>8,9</sup>                                                | <b>0.39±0.35</b>  |
| Consecutive winter days with SWH above 3m   | 0-29 (days)      | The development of gametophytes can be compromised due to scouring and burial <sup>10,11</sup>                       | -0.2±0.36         |
| Maximum SWH of winter                       | 2.75-10.53 (m)   | Individual days of high waves can promote scouring and burial of gametophytes <sup>10,11</sup>                       | 0.22±0.32         |
| Consecutive spring days with SWH above 3m   | 0-12 (days)      | The development of sporophytes can be compromised due to scouring and burial <sup>10,11</sup>                        | <b>0.25±0.38</b>  |
| Maximum SWH of spring                       | 2.32-9.20 (m)    | Individual days of high waves can wipe out sporophytes during recruitment <sup>8,9</sup>                             | -0.3±0.36         |
| Consecutive summer days with CUI above 16   | 0-92 (days)      | Favourable upwelling conditions driving nutrients for sporophytes <sup>12,13</sup>                                   | 3.28±0.48         |
| Consecutive summer days with CUI above 32   | 0-82 (days)      | Strong upwelling conditions driving nutrients for sporophytes <sup>12,13</sup>                                       | 2.20±0.49         |
| Consecutive spring days with CUI above 16   | 2-110 (days)     | Favourable upwelling conditions driving nutrients for sporophytes during recruitment <sup>12,13</sup>                | <b>8.44±0.47</b>  |
| Consecutive spring days with CUI above 32   | 0-65 (days)      | Strong upwelling conditions driving nutrients for sporophytes during recruitment <sup>12,13</sup>                    | 3.25±0.47         |

## References

1. Norton, T. A. Experiments on the factors influencing the geographical distributions of *Saccorhiza polyschides* and *Saccorhiza dermatodea*. *New Phytol.* **78**, 625–635 (1977).
2. Wernberg, T. *et al.* Decreasing resilience of kelp beds along a latitudinal temperature gradient: Potential implications for a warmer future. *Ecol. Lett.* **13**, 685–694 (2010).
3. Hoek, C. Van Den. The distribution of benthic marine algae in relation to the temperature regulation of their life histories. *Biol. J. Linn. Soc.* **18**, 81–144 (1982).
4. Fernandez, C. The retreat of large brown seaweeds on the north coast of Spain: the case of *Saccorhiza polyschides*. *Eur. J. Phycol.* **46**, 352–360 (2011).
5. Lüning, K. Critical levels of light and temperature regulating the gametogenesis of 3 *Laminaria spp phaeophyceae*. *J. Phycol.* **16**, 1–15 (1980).
6. Dieck, I. T. Temperature tolerance and survival in darkness of kelp gametophytes (*Laminariales*, Phaeophyta) - Ecological and biogeographical implications. *Mar. Ecol. Prog. Ser.* **100**, 253–264 (1993).
7. Graham, M. H. *et al.* Population dynamics of giant kelp *Macrocystis pyrifera* along a wave exposure gradient. *Mar. Ecol. Prog. Ser.* **148**, 269–279 (1997).
8. Cavanaugh, K. C. *et al.* Synchrony in dynamics of giant kelp forests is driven by both local recruitment and regional environmental controls. *Ecology* **94**, 499–509 (2013).



9. Reed, D. C., Rassweiler, A. & Arkema, K. K. Biomass rather than growth rate determines variation in net primary production by giant kelp. *Ecology* **89**, 2493–2505 (2008).
10. Engledow, H. R. & Bolton, J. J. Seaweed alpha-diversity within the lower eulittoral zone in Namibia - the effects of wave action, sand inundation, mussels and limpets. *Bot. Mar.* **37**, 267–276 (1994).
11. Norton, T. A. The factors influencing the distribution of *Saccorhiza polyschides* in the region of Lough Ine. *J. Mar. Biol. Assoc.* **58**, 527–536 (1978).
12. Perez, B. Comparison of upwelling indices off Baja California derived from three different wind data sources. *CalCOFI Rep.* **48**, 204 – 214 (2007).
13. Alvarez, I., Gomez-Gesteira, M., deCastro, M., Gomez-Gesteira, J. L. & Dias, J. M. Summer upwelling frequency along the western Cantabrian coast from 1967 to 2007. *J. Mar. Syst.* **79**, 218–226 (2010).

Supplementary Figure S2. Relationship between temperature and nutrients (top left panel: Nitrates; top right panel: Phosphates) and between coastal upwelling index (averaged for spring; MAMJ) and nutrients (bottom left panel: Nitrates; bottom right panel: Phosphates) inferred for the study region. In situ data obtained from the World Ocean Atlas<sup>1</sup>, CARbon IN the Atlantic<sup>2</sup> and the Global Ocean Data Analysis Project<sup>3</sup>.

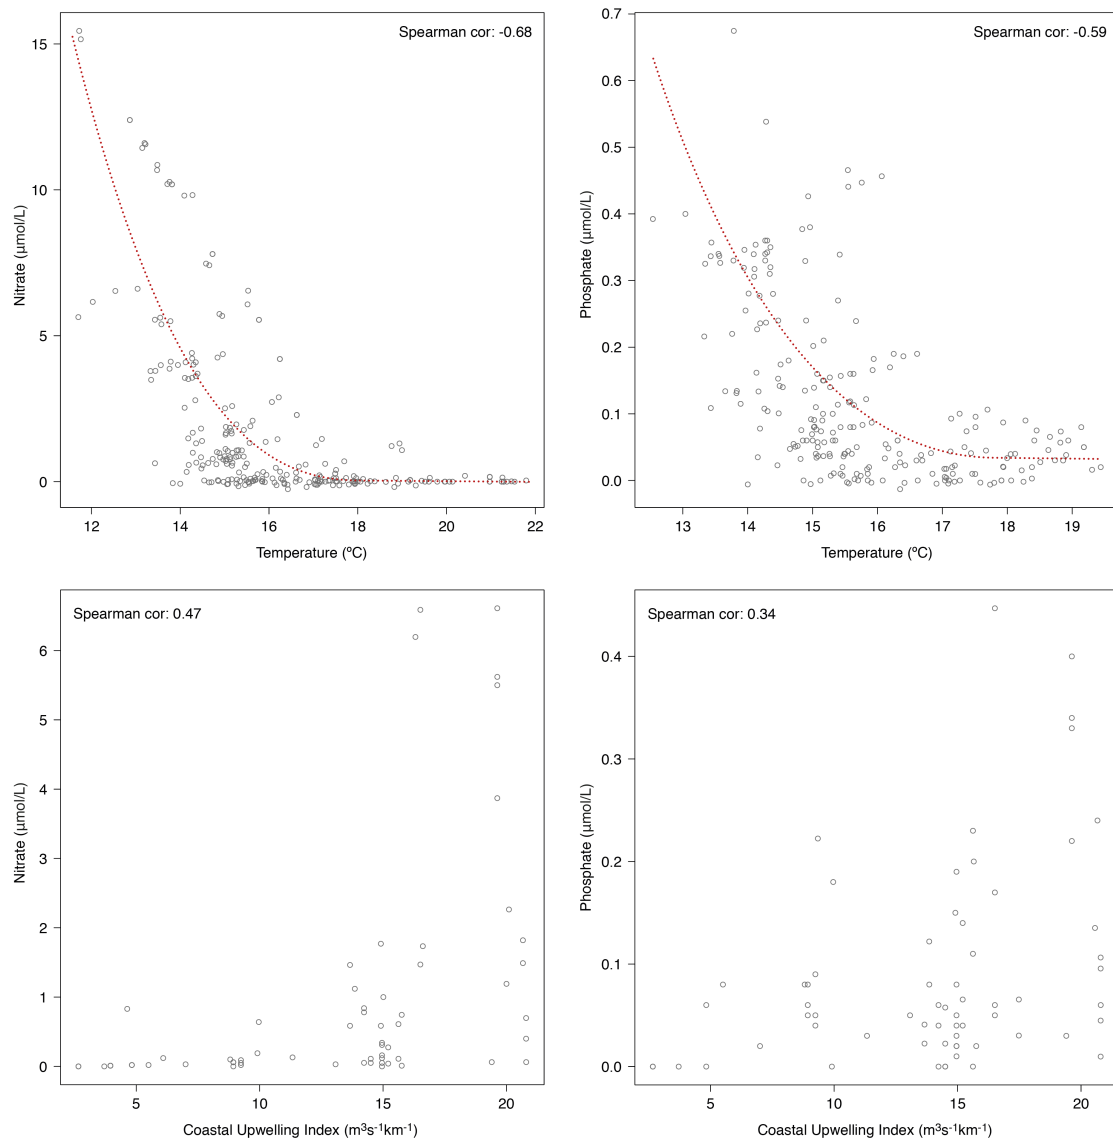

## References

1. Locarnini, R. A., A. V. Mishonov, J. I. Antonov, T. P. Boyer, H. E. Garcia, O. K. Baranova, M. M. Zweng, C. R. Paver, J. R. Reagan, D. R. Johnson, M. Hamilton, and D. Seidov, 2013. World Ocean Atlas 2013, Volume 1: Temperature. S. Levitus, Ed., A. Mishonov Technical Ed.; NOAA Atlas NESDIS 73, 40 pp.
2. Tanhua, T., Brown, P. J., and Key, R. M.: CARINA: nutrient data in the Atlantic Ocean, *Earth Syst. Sci. Data*, 1, 7-24, 2009.
3. Key, R.M., A. Kozyr, C.L. Sabine, K. Lee, R. Wanninkhof, J. Bullister, R.A. Feely, F. Millero, C. Mordy, T.-H. Peng. 2004. A global ocean carbon climatology: Results from GLODAP. *Global Biogeochemical Cycles*, Vol. 18, GB4031 (PDF).

Supplementary Figure S3. Reconstruction of the species' distribution based on summer predictors only and no potential for temporal dispersal (macroscopic traits only). (Top left panel) Predicted distribution for 2014 and (right top panel) areas of persistence and extinction predicted from 1986 to 2014. (Bottom panel) Extent of *S. polyschides* in Iberia-Morocco predicted from 1986 to 2100 with remote sensing data and AOGCMs (under two scenarios of greenhouse gas emissions; RCP26 and RCP8.5). The inset displays the accuracy of hindcasts as True Skill Statistics, sensitivity (true presence rate) and specificity (true absence rate). Maps generated with QGIS (QGIS Development Team, 2016. QGIS Geographic Information System. Open Source Geospatial Foundation Project. <http://www.qgis.org/>).

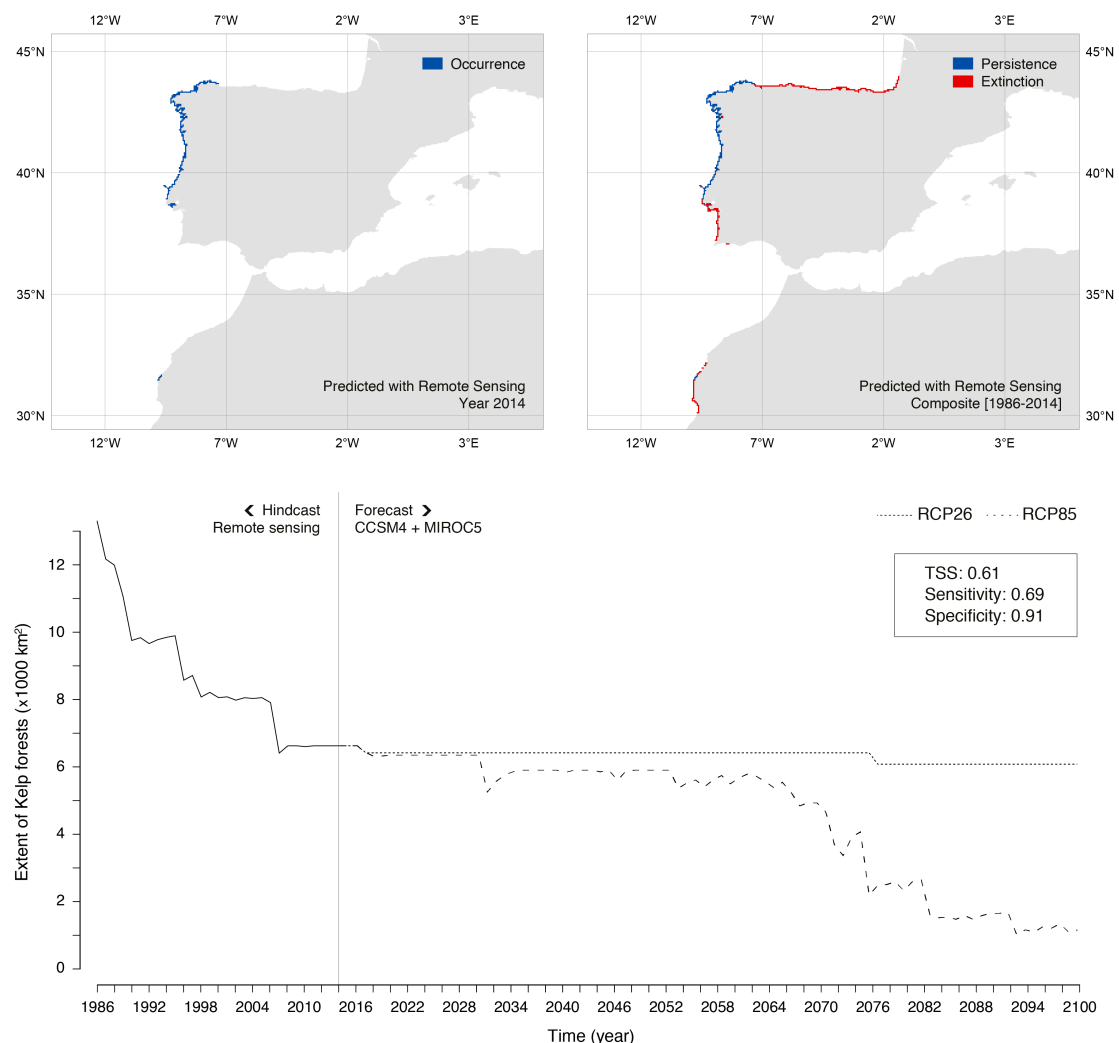

Supplementary Figure S4. Time-series of the most important predictors included in the final ensemble, averaged for the Iberia-Morocco region (SST - Sea Surface Temperature; CUI – Coastal Upwelling Index; Winter: NDJF; Spring: MAMJ).

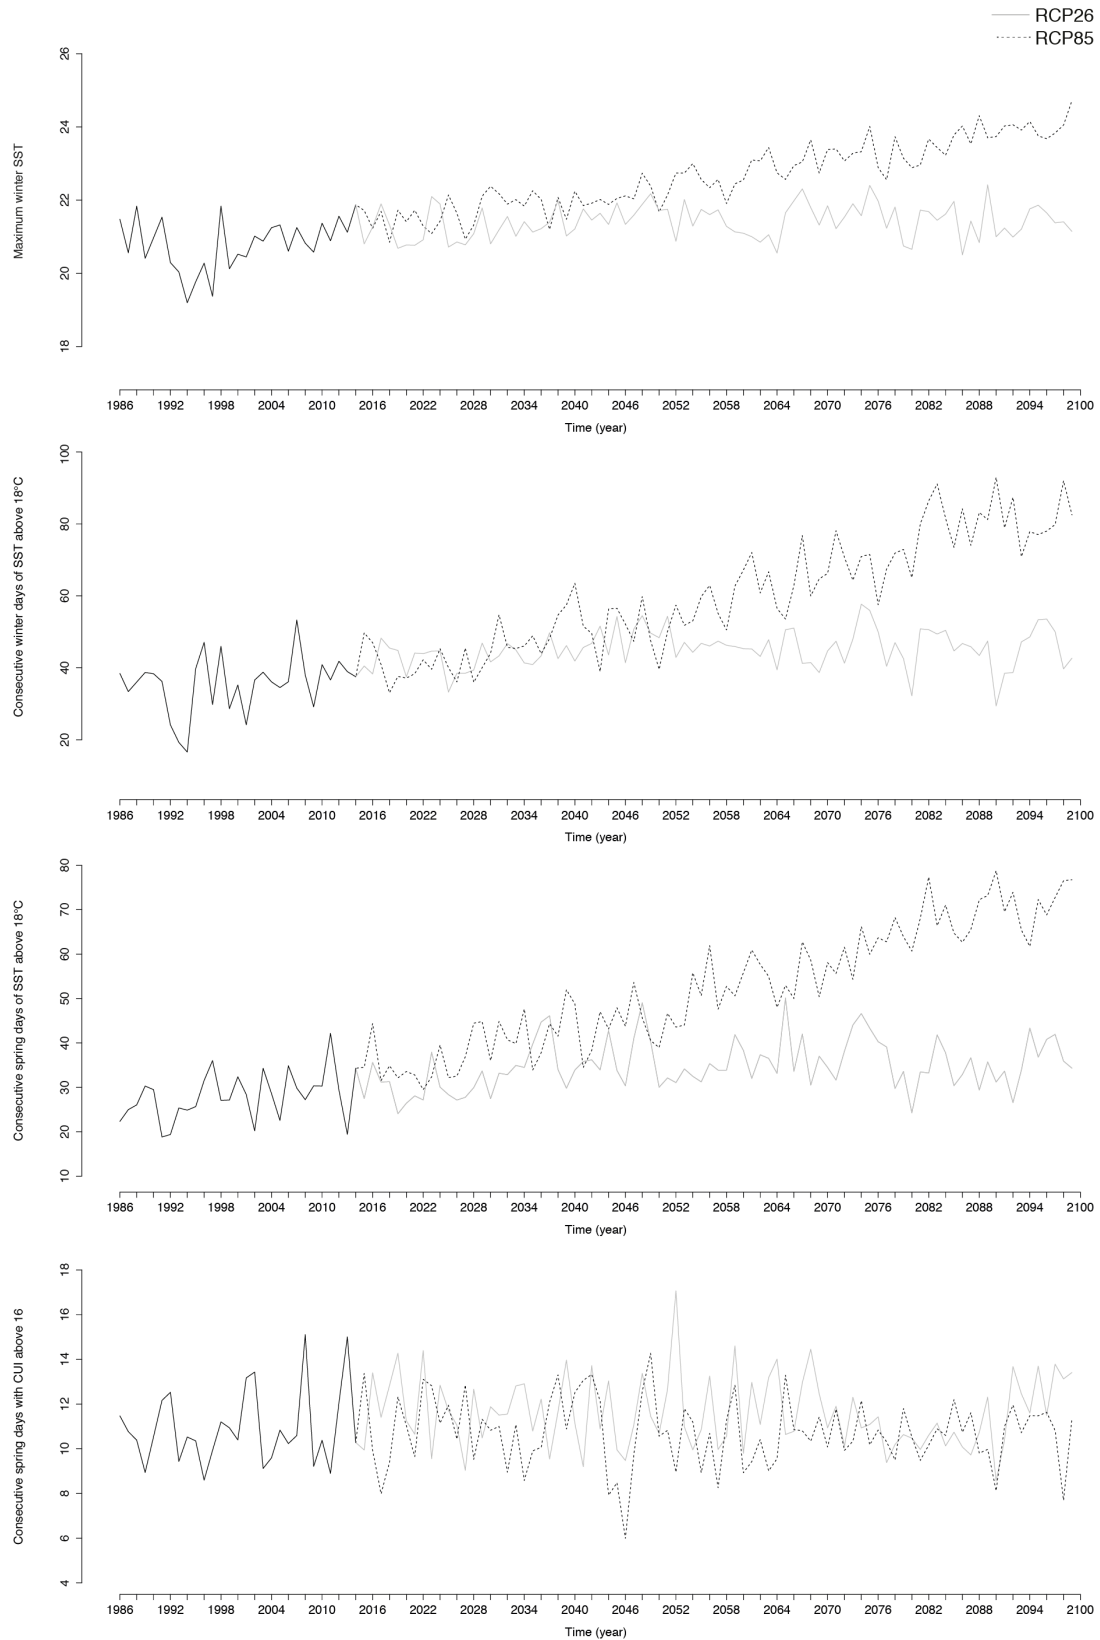

Supplement: srep44348-s1.pdf [file srep44348-s1.pdf]
